# Supplementary material for: Global distribution of surgeons, anaesthesiologists, and obstetricians
Source: Elsevier journal article supplement (doi:10.1016/s2214-109x(14)70349-3), 2015-04-01
Supplement: mmc1 [file mmc1.pdf]

## Supplementary appendix

This appendix formed part of the original submission and has been peer reviewed. We post it as supplied by the authors.

Supplement to: Holmer H, Lantz A, Kunjumen T, et al. Global distribution of surgeons, anaesthesiologists, and obstetricians. *Lancet Glob Health* 2015; **3**: S9–11.

## APPENDIX

### Definitions

All actively practicing, licenced, qualified surgeons, anaesthesiologists and obstetricians were included. Licenced providers were defined according to the local medical licensing authorities. Residents or trainees were excluded, to reflect only fully trained personnel, when this was possible, as were visiting specialists on short-term visits. Physicians and other health care providers who were not licensed as surgeons were excluded, even in countries where such providers may be permitted to perform certain operations. All surgical specialties were included in the surgeon category. Intensivists were excluded where they were registered separately from anaesthesiologists. Non-obstetrician gynaecologists were excluded where they were registered separately. WHO country names and regional classifications were used, along with the World Bank income classification (2014 revision), based on the per capita gross domestic product converted using the Atlas Method (Supplementary table 2).<sup>16</sup> WHO member countries were also subdivided into five quintiles depending on the per capita total expenditure on health (PPP int. \$, 2012 or most recent value), with the 1<sup>st</sup> quintile consisting of the 39 lowest and the 5<sup>th</sup> quintile consisting of the 39 highest expenditure countries.

### Country grouping by WHO Region, World Bank Income Category and Health Care Expenditure Quintiles

#### WHO Regions

---

##### African Region

Algeria, Angola, Benin, Botswana, Burkina Faso, Burundi, Cameroon, Cape Verde, Central African Republic, Chad, Comoros, Congo, Côte d'Ivoire, Democratic Republic of the Congo, Equatorial Guinea, Eritrea, Ethiopia, Gabon, Gambia, Ghana, Guinea, Guinea-Bissau, Kenya, Lesotho, Liberia, Madagascar, Malawi, Mali, Mauritania, Mauritius, Mozambique, Namibia, Niger, Nigeria, Rwanda, Sao Tome and Principe, Senegal, Seychelles, Sierra Leone, South Africa, South Sudan, Swaziland, Togo, Uganda, United Republic of Tanzania, Zambia, Zimbabwe

##### American Region

Antigua and Barbuda, Argentina, Bahamas, Barbados, Belize, Bolivia (Plurinational State of), Brazil, Canada, Chile, Colombia, Costa Rica, Cuba, Dominica, Dominican Republic, Ecuador, El Salvador, Grenada, Guatemala, Guyana, Haiti, Honduras, Jamaica, Mexico, Nicaragua, Panama, Paraguay, Peru, Saint Kitts and Nevis, Saint Lucia, Saint Vincent and the Grenadines, Suriname, Trinidad and Tobago, United States of America, Uruguay, Venezuela (Bolivarian Republic of)

**Eastern Mediterranean Region**

Afghanistan, Bahrain, Djibouti, Egypt, Iran (Islamic Republic of), Iraq, Jordan, Kuwait, Lebanon, Libya, Morocco, Oman, Pakistan, Qatar, Saudi Arabia, Somalia, Sudan, Syrian Arab Republic, Tunisia, United Arab Emirates, Yemen

**European Region**

Albania, Andorra, Armenia, Austria, Azerbaijan, Belarus, Belgium, Bosnia and Herzegovina, Bulgaria, Croatia, Cyprus, Czech Republic, Denmark, Estonia, Finland, France, Georgia, Germany, Greece, Hungary, Iceland, Ireland, Israel, Italy, Kazakhstan, Kyrgyzstan, Latvia, Lithuania, Luxembourg, Malta, Monaco, Montenegro, Netherlands, Norway, Poland, Portugal, Republic of Moldova, Romania, Russian Federation, San Marino, Serbia, Slovakia, Slovenia, Spain, Sweden, Switzerland, Tajikistan, The former Yugoslav Republic of Macedonia, Turkey, Turkmenistan, Ukraine, United Kingdom, Uzbekistan

**South-East Asian Region**

Bangladesh, Bhutan, Democratic People's Republic of Korea, India, Indonesia, Maldives, Myanmar, Nepal, Sri Lanka, Thailand, Timor-Leste

**Western Pacific Region**

Australia, Brunei Darussalam, Cambodia, China, Cook Islands, Fiji, Japan, Kiribati, Lao People's Democratic Republic, Malaysia, Marshall Islands, Micronesia (Federated States of), Mongolia, Nauru, New Zealand, Niue, Palau, Papua New Guinea, Philippines, Republic of Korea, Samoa, Singapore, Solomon Islands, Tonga, Tuvalu, Vanuatu, Viet Nam

**World Bank Income Categories**

---

**High-income countries**

Andorra, Antigua and Barbuda, Australia, Austria, Bahamas, Bahrain, Barbados, Belgium, Brunei Darussalam, Canada, Chile, Cook Islands, Croatia, Cyprus, Czech Republic, Denmark, Equatorial Guinea, Estonia, Finland, France, Germany, Greece, Iceland, Ireland, Israel, Italy, Japan, Kuwait, Latvia, Lithuania, Luxembourg, Malta, Monaco, Nauru, Netherlands, New Zealand, Norway, Oman, Poland, Portugal, Qatar, Republic of Korea, Russian Federation, Saint Kitts and Nevis, San Marino, Saudi Arabia, Singapore, Slovakia, Slovenia, Spain, Sweden, Switzerland, Trinidad and Tobago, United Arab Emirates, United Kingdom, United States of America, Uruguay

**Upper-middle income countries**

Albania, Algeria, Angola, Argentina, Azerbaijan, Belarus, Belize, Bosnia and Herzegovina, Botswana, Brazil, Bulgaria, China, Colombia, Costa Rica, Cuba, Dominica, Dominican Republic, Ecuador, Fiji, Gabon, Grenada, Hungary, Iran (Islamic Republic of), Iraq, Jamaica, Jordan, Kazakhstan, Lebanon, Libya, Malaysia, Maldives, Marshall Islands, Mauritius, Mexico, Montenegro, Namibia, Palau, Panama, Peru, Romania, Saint Lucia, Saint Vincent and the Grenadines, Serbia, Seychelles, South Africa, Suriname, Thailand, The former Yugoslav Republic of Macedonia, Tonga, Tunisia, Turkey, Turkmenistan, Tuvalu, Venezuela (Bolivarian Republic of)

**Lower-middle income countries**

Armenia, Bhutan, Bolivia (Plurinational State of), Cameroon, Cape Verde, Congo, Côte d'Ivoire, Djibouti, Egypt, El Salvador, Georgia, Ghana, Guatemala, Guyana, Honduras, India, Indonesia, Kiribati, Kyrgyzstan, Lao People's Democratic Republic, Lesotho, Mauritania, Micronesia (Federated States of), Mongolia, Morocco, Nicaragua, Nigeria, Pakistan, Papua New Guinea, Paraguay, Philippines, Republic of Moldova, Samoa, Sao Tome and Principe, Senegal, Solomon Islands, South Sudan, Sri Lanka, Sudan, Swaziland, Syrian Arab Republic, Timor-Leste, Ukraine, Uzbekistan, Vanuatu, Viet Nam, Yemen, Zambia

**Low-income countries**

Afghanistan, Bangladesh, Benin, Burkina Faso, Burundi, Cambodia, Central African Republic, Chad, Comoros, Democratic People's Republic of Korea, Democratic Republic of the Congo, Eritrea, Ethiopia, Gambia, Guinea, Guinea-Bissau, Haiti, Kenya, Liberia, Madagascar, Malawi, Mali, Mozambique, Myanmar, Nepal, Niger, Niue, Rwanda, Sierra Leone, Somalia, Tajikistan,

Togo, Uganda, United Republic of Tanzania, Zimbabwe

### Health Expenditure Quintiles\*

---

#### 5<sup>th</sup> Quintile

Andorra, Australia, Austria, Bahamas, Belgium, Canada, Cyprus, Czech Republic, Denmark, Finland, France, Germany, Greece, Hungary, Iceland, Ireland, Israel, Italy, Japan, Luxembourg, Malta, Monaco, Netherlands, New Zealand, Niue, Norway, Palau, Portugal, Qatar, Republic of Korea, San Marino, Singapore, Slovakia, Slovenia, Spain, Sweden, Switzerland, United Kingdom, United States of America

#### 4<sup>th</sup> Quintile

Antigua and Barbuda, Argentina, Bahrain, Barbados, Belarus, Bosnia and Herzegovina, Botswana, Brazil, Brunei Darussalam, Bulgaria, Chile, Costa Rica, Croatia, Equatorial Guinea, Estonia, Iran (Islamic Republic of), Kuwait, Latvia, Lebanon, Lithuania, Mexico, Montenegro, Oman, Panama, Poland, Romania, Russian Federation, Saint Kitts and Nevis, Saint Lucia, Saudi Arabia, Serbia, Seychelles, South Africa, The former Yugoslav Republic of Macedonia, Trinidad and Tobago, Turkey, United Arab Emirates, Uruguay

#### 3<sup>rd</sup> Quintile

Albania, Algeria, Azerbaijan, Belize, China, Colombia, Cook Islands, Cuba, Dominica, Dominican Republic, Ecuador, El Salvador, Gabon, Georgia, Grenada, Guatemala, Honduras, Jamaica, Jordan, Kazakhstan, Libya, Malaysia, Maldives, Marshall Islands, Mauritius, Micronesia (Federated States of), Namibia, Paraguay, Peru, Republic of Moldova, Saint Vincent and the Grenadines, Suriname, Swaziland, Thailand, Tunisia, Tuvalu, Ukraine, Venezuela (Bolivarian Republic of)

#### 2<sup>nd</sup> Quintile

Angola, Armenia, Bhutan, Bolivia (Plurinational State of), Cambodia, Cape Verde, Congo, Côte d'Ivoire, Djibouti, Egypt, Fiji, Guyana, India, Indonesia, Iraq, Kiribati, Kyrgyzstan, Lesotho, Mongolia, Morocco, Nauru, Nicaragua, Nigeria, Papua New Guinea, Philippines, Rwanda, Samoa, Sao Tome and Principe, Sierra Leone, Solomon Islands, Sri Lanka, Sudan, Syrian Arab Republic, Tonga, Turkmenistan, Uzbekistan, Vanuatu, Viet Nam

#### 1<sup>st</sup> Quintile

Afghanistan, Bangladesh, Benin, Burkina Faso, Burundi, Cameroon, Central African Republic, Chad, Comoros, Democratic Republic of the Congo, Eritrea, Ethiopia, Gambia, Ghana, Guinea, Guinea-Bissau, Haiti, Kenya, Lao People's Democratic Republic, Liberia, Madagascar, Malawi, Mali, Mauritania, Mozambique, Myanmar, Nepal, Niger, Pakistan, Senegal, Somalia, South Sudan, Tajikistan, Timor-Leste, Togo, Uganda, United Republic of Tanzania, Yemen, Zambia

---

\* Zimbabwe and Democratic People's Republic of Korea were excluded due to lack of health expenditure data

**Table S1. Data sources by country, tabulated by WHO regions, including year of data and most recent year of national physician workforce included in the WHO Global Health Observatory (<http://apps.who.int/gho/data/node.main?lang=en>)**

|                                  | Surgeons, Anaesthesiologists and Obstetricians |                                                                                                                                                                                                                                                                                                                                                                         |      | Total physicians |
|----------------------------------|------------------------------------------------|-------------------------------------------------------------------------------------------------------------------------------------------------------------------------------------------------------------------------------------------------------------------------------------------------------------------------------------------------------------------------|------|------------------|
| Year                             | Data source                                    | Comment                                                                                                                                                                                                                                                                                                                                                                 | year |                  |
| <b>African Region</b>            |                                                |                                                                                                                                                                                                                                                                                                                                                                         |      |                  |
| Algeria                          | 2013                                           | Statistiques Sanitaires, Ministère de la Santé de la Population et de la Réforme Hospitalière                                                                                                                                                                                                                                                                           | 2007 |                  |
| Benin                            | 2014                                           | College des Jeunes Médecins du Bénin                                                                                                                                                                                                                                                                                                                                    | 2008 |                  |
| Botswana                         | 2014                                           | Botswana Ministry of Health                                                                                                                                                                                                                                                                                                                                             | 2006 |                  |
| Burkina Faso                     | 2014                                           | Burkina Faso Ministry of Health                                                                                                                                                                                                                                                                                                                                         | 2010 |                  |
| Cameroon                         | 2013                                           | Society of Gynecologists and Obstetricians of Cameroon, Médecins du Cameroun                                                                                                                                                                                                                                                                                            | 2009 |                  |
| Cape Verde                       | 2011                                           | Relatório estatístico 2011, Ministry of Health                                                                                                                                                                                                                                                                                                                          | 2010 |                  |
| Central African Republic         | 2014                                           | Système Nationale d'Information de Santé; Sassara Sarl et ACCESS Sarl                                                                                                                                                                                                                                                                                                   | 2009 |                  |
| Chad                             | 2013                                           | Chad Surgical Society                                                                                                                                                                                                                                                                                                                                                   | 2006 |                  |
| Congo                            | 2013                                           | Congo-Brazzaville Surgical Society                                                                                                                                                                                                                                                                                                                                      | 2007 |                  |
| Côte d'Ivoire                    | 2014                                           | Conseil National de l'Ordre des Médecins de Côte d'Ivoire; Société Ivoirienne d'Anesthésie Réanimation                                                                                                                                                                                                                                                                  | 2008 |                  |
| Democratic Republic of the Congo | 2013                                           | Longombe, AO. La Cartographie des Medecins Specialistes dans les Quatre Grandes Disciplines Cliniques ainsi que l'Anesthésie-Reanimation en Republique Democratique Du Congo (RDC). (Mapping of Medical Specialists in the Four Great Clinical Specialities as well as Anesthesia in the Democratic Republic of the Congo) Great Lakes Medical Review 2014; 6 (2): 8-12 | 2004 |                  |
| Eritrea                          | 2008                                           | Sharan M, Ahmed S, Ghebrehiwet M, Rogo K. The quality of the maternal health system in Eritrea. International journal of gynaecology and obstetrics: the official organ of the International Federation of Gynaecology and Obstetrics 2011; 115(3): 244-50.                                                                                                             | 2004 |                  |
| Ethiopia                         | 2014                                           | Ethiopia Ministry of Health                                                                                                                                                                                                                                                                                                                                             | 2009 |                  |
| Gabon                            | 1999                                           | Sanou et al. 1999                                                                                                                                                                                                                                                                                                                                                       | 2004 |                  |
| Gambia                           | 2011                                           | Gambia Medical and Dental Council; Directorate of Health Promotion and Education, The Gambia Ministry of Health and Social Welfare                                                                                                                                                                                                                                      | 2008 |                  |
| Guinea                           | 1999                                           | Sanou et al. 1999                                                                                                                                                                                                                                                                                                                                                       | 2005 |                  |
| Kenya                            | 2014                                           | Kenya Medical Practitioners and Dentists Board                                                                                                                                                                                                                                                                                                                          | 2011 |                  |
| Lesotho                          | 2014                                           | Queen Mamohato Nemorial Hospital, Maseru, Lesotho                                                                                                                                                                                                                                                                                                                       | 2003 |                  |
| Liberia                          | 2009                                           | Liberia Institute of Statistics and Geo-Information Services (2010) The national census of health workers in Liberia 2009. Monrovia, Liberia                                                                                                                                                                                                                            | 2008 |                  |
| Madagascar                       | 2013                                           | l'Hôpital Universitaire Joseph Ravoahangy Andrianavalona                                                                                                                                                                                                                                                                                                                | 2007 |                  |
| Malawi                           | 2014                                           | Medical Council of Malawi                                                                                                                                                                                                                                                                                                                                               | 2009 |                  |
| Mali                             | 2014                                           | Société D'Anesthésie Réanimation Médecine D'urgence Du Mali (SARMU-Mali)                                                                                                                                                                                                                                                                                                | 2010 |                  |
| Mauritius                        | 2014                                           | Medical College of Mauritius                                                                                                                                                                                                                                                                                                                                            | 2004 |                  |
| Mozambique                       | 2013                                           | Mozambique Ministry of Health                                                                                                                                                                                                                                                                                                                                           | 2012 |                  |
| Niger                            | 2014                                           | Direction des Ressources Humaines/Ministère de la Santé Publique du Niger                                                                                                                                                                                                                                                                                               | 2008 |                  |
| Nigeria                          | 2014                                           | Medical and Dental Council of Nigeria                                                                                                                                                                                                                                                                                                                                   | 2009 |                  |
| Rwanda                           | 2014                                           | Rwanda Medical and Dental Council and Rwanda Professional Societies                                                                                                                                                                                                                                                                                                     | 2010 |                  |
| Senegal                          | 2011                                           | Senegal Ministry of Health                                                                                                                                                                                                                                                                                                                                              | 2008 |                  |
| Seychelles                       | 2014                                           | Seychelles Ministry of health                                                                                                                                                                                                                                                                                                                                           | 2004 |                  |
| Sierra Leone                     | 2012                                           | Ministry of Health and Sanitation                                                                                                                                                                                                                                                                                                                                       | 2010 |                  |
| South Africa                     | 2014                                           | Health Professions Council of South Africa                                                                                                                                                                                                                                                                                                                              | 2013 |                  |
| Swaziland                        | 2010                                           | Dubowitz G, Detlefs S, McQueen KA. Global anesthesia workforce crisis: a preliminary survey revealing shortages contributing to undesirable outcomes and unsafe practices. World journal of surgery 2010; 34(3): 438-44.                                                                                                                                                | 2009 |                  |

|                                    |      |                                                                                                                                                                                                                                                                        |                     |      |
|------------------------------------|------|------------------------------------------------------------------------------------------------------------------------------------------------------------------------------------------------------------------------------------------------------------------------|---------------------|------|
| Togo                               | 2014 | Clinique Medico Chirurgicale, Togo                                                                                                                                                                                                                                     |                     | 2008 |
| Uganda                             | 2012 | Linden AF, Sekidde FS, Galukande M, Knowlton LM, Chackungal S, McQueen KA. Challenges of surgery in developing countries: a survey of surgical and anesthesia capacity in Uganda's public hospitals. World journal of surgery 2012; 36(5): 1056-65.                    |                     | 2005 |
| United Republic of Tanzania        | 2010 | Ministry of Health of Tanzania                                                                                                                                                                                                                                         |                     | 2006 |
| Zambia                             | 2012 | The 2012 Annual Report; Health Professions Council of Zambia                                                                                                                                                                                                           |                     | 2010 |
| Zimbabwe                           | 2014 | The Medical and Dental Practitioners Council of Zimbabwe 2014 statistics                                                                                                                                                                                               |                     |      |
| <b>American Region</b>             |      |                                                                                                                                                                                                                                                                        |                     |      |
| Antigua and Barbuda                | 2014 | Antigua and Barbuda Ministry of Health                                                                                                                                                                                                                                 |                     | 1999 |
| Argentina                          | 2014 | Argentinean Federation of Anesthesiologists                                                                                                                                                                                                                            |                     | 2004 |
| Barbados                           | 2014 | Barbados Ministry of Health                                                                                                                                                                                                                                            |                     | 2005 |
| Bolivia (Plurinational State of)   | 2012 | Lebrun DG, Saavedra-Pozo I, Agreda-Flores F, Burdic ML, Notrica MR, McQueen KA. Surgical and anesthesia capacity in Bolivian public hospitals: results from a national hospital survey. World journal of surgery 2012; 36(11): 2559-66.                                |                     | 2011 |
| Brazil                             | 2013 | Brazilian Medical Demography, Federal Council of Medicine                                                                                                                                                                                                              |                     | 2013 |
| Canada                             | 2012 | Canadian Institute for Health Information                                                                                                                                                                                                                              |                     | 2010 |
| Chile                              | 2012 | Registro de Prestadores Individuales, Superintendencia de Salud                                                                                                                                                                                                        |                     | 2009 |
| Colombia                           | 2014 | Federación Médica Colombiana (Anesthesiologists); Rosselli D, Otero A, Heller D, Calderón C, Moreno S, Pérez A. Estimación de la oferta de médicos especialistas en Colombia con el método de captura-recaptura. Revista Panamericana de Salud Pública 2001; 9: 393-8. |                     | 2010 |
| Costa Rica                         | 2014 | College of Physicians & Surgeons of Costa Rica                                                                                                                                                                                                                         |                     | 2013 |
| Cuba                               | 2013 | Anuario Estadístico De Salud 2013                                                                                                                                                                                                                                      |                     | 2010 |
| Dominica                           | 2014 | Dominica Ministry of Health                                                                                                                                                                                                                                            |                     | 2001 |
| Ecuador                            | 2014 | Ecuador Ministry of Health                                                                                                                                                                                                                                             |                     | 2009 |
| El Salvador                        | 2009 | Molina G, et al. Evaluation of Surgical Care in El Salvador Using the WHO Surgical Vital Statistics. World J Surg (2013) 37:1227-1235                                                                                                                                  |                     | 2008 |
| Grenada                            | 2014 | Grenada Ministry of Health                                                                                                                                                                                                                                             |                     | 2006 |
| Guatemala                          | 2014 | Professional Societies; Surgery only covers general surgery                                                                                                                                                                                                            |                     | 2009 |
| Guyana                             | 2014 | Medical Council of Guyana                                                                                                                                                                                                                                              |                     | 2010 |
| Haiti                              | 2014 | Dr. Gerald Lerebours, via Tú M. TRÀN                                                                                                                                                                                                                                   |                     | 1998 |
| Honduras                           | 2014 | Colegio Médico de Honduras                                                                                                                                                                                                                                             |                     | 2005 |
| Jamaica                            | 2014 | Medical Council of Jamaica, University of the West Indies Department of Surgery, Radiology and Intensive Care                                                                                                                                                          |                     | 2008 |
| Mexico                             | 2012 | Federación Mexicana de Colegios de Obstetricia y Ginecología (FEMECOG)                                                                                                                                                                                                 |                     | 2011 |
| Nicaragua                          | 2014 | Ministerio De Salud, Division General De Recursos Humanos, Distribución De Medicos Especialistas Por Departamento Y Municipio                                                                                                                                          |                     | 2003 |
| Panama                             | 2014 | Panama Ministry of Health, Dirección De Recursos Humanos, Dpto. De Estadística De Planificación                                                                                                                                                                        |                     | 2011 |
| Paraguay                           | 2014 | Paraguay Ministry of Health                                                                                                                                                                                                                                            |                     | 2002 |
| Peru                               | 2014 | Peruvian Society of Surgeons                                                                                                                                                                                                                                           |                     | 2012 |
| Saint Kitts and Nevis              | 2014 | Saint Kitts and Nevis Ministry of Health, Chief Medical Officer                                                                                                                                                                                                        |                     | 2001 |
| Saint Lucia                        | 2014 | Saint Lucia Medical and Dental Council                                                                                                                                                                                                                                 |                     | 2002 |
| Saint Vincent and the Grenadines   | 2014 | Saint Vincent and the Grenadines, Ministry of Health, Wellness and the Environment                                                                                                                                                                                     |                     | 2001 |
| Trinidad and Tobago                | 2014 | Medical Board of Trinidad and Tobago                                                                                                                                                                                                                                   | Only those licenced | 2007 |
| United States of America           | 2011 | American Medical Association (AMA) Database                                                                                                                                                                                                                            |                     | 2011 |
| Uruguay                            | 2014 | Professional Society                                                                                                                                                                                                                                                   |                     | 2008 |
| Venezuela (Bolivarian Republic of) | 2014 | Venezuelan Surgery Society; Veneuelan Obstetrics and Gynaecology Society                                                                                                                                                                                               |                     | 2001 |

|                              |                                           |                                                                                                                                                                                                                                                                               |                                                                  |      |
|------------------------------|-------------------------------------------|-------------------------------------------------------------------------------------------------------------------------------------------------------------------------------------------------------------------------------------------------------------------------------|------------------------------------------------------------------|------|
| Eastern Mediterranean Region |                                           |                                                                                                                                                                                                                                                                               |                                                                  |      |
| Afghanistan                  | 2010                                      | Dubowitz G, Detlefs S, McQueen KA. Global anesthesia workforce crisis: a preliminary survey revealing shortages contributing to undesirable outcomes and unsafe practices. <i>World journal of surgery</i> 2010; 34(3): 438-44.                                               |                                                                  | 2011 |
| Bahrain                      | 2012                                      | Kingdom of Bahrain Ministry of Health                                                                                                                                                                                                                                         |                                                                  | 2011 |
| Djibouti                     | 2013                                      | Djibouti Ministry of Health                                                                                                                                                                                                                                                   |                                                                  | 2006 |
| Egypt                        | 2014                                      | Egyptian Medical Syndicate                                                                                                                                                                                                                                                    |                                                                  | 2009 |
| Iran (Islamic Republic of)   | 2014                                      | Ministry of Health Office of Information and Statistics                                                                                                                                                                                                                       | Calculated based on density/10000 multiplied by Iran pop. (2012) | 2005 |
| Iraq                         | 2013                                      | Iraq Ministry of Health, Annual Statistical Report 2013                                                                                                                                                                                                                       |                                                                  | 2010 |
| Lebanon                      | 2014                                      | Lebanese Order of Physicians (Excludes North Lebanon Order of Physicians)                                                                                                                                                                                                     |                                                                  | 2011 |
| Morocco                      | 2011                                      | Santé en Chiffres 2012, Report from the Morocco Ministry of Health                                                                                                                                                                                                            |                                                                  | 2009 |
| Oman                         | 2013                                      | Oman Ministry of Health                                                                                                                                                                                                                                                       |                                                                  | 2011 |
| Pakistan                     | 2012                                      | Pakistan Medical and Dental Council                                                                                                                                                                                                                                           |                                                                  | 2010 |
| Qatar                        | 2011                                      | The Hamad Medical Corporation, Annual Health Report (2011)                                                                                                                                                                                                                    |                                                                  | 2010 |
| Somalia                      | 2014                                      | Ministry of Health                                                                                                                                                                                                                                                            | Only Central and South Somalia                                   | 2006 |
| Sudan                        | 2014                                      | Sudan Professional Societies                                                                                                                                                                                                                                                  |                                                                  | 2008 |
| Tunisia                      | 2014                                      | The National Medical Council of Tunisia                                                                                                                                                                                                                                       | Only general surgeons                                            | 2010 |
| Yemen                        | 2014                                      | Yemeni Board of Medical Specialization                                                                                                                                                                                                                                        |                                                                  | 2010 |
| <b>European Region</b>       |                                           |                                                                                                                                                                                                                                                                               |                                                                  |      |
| Albania                      | Obstetricians:<br>2011<br>Others:<br>2009 | WHO European Regional Office (2014) European database on human and technical resources for health (HlthRes-DB) (Accessed on September 18 2014): <a href="http://data.euro.who.int/HlthResDB/">http://data.euro.who.int/HlthResDB/</a>                                         | Surgeons encompasses anaesthesiologists                          | 2012 |
| Andorra                      | 2014                                      | Andorra Ministry of Health                                                                                                                                                                                                                                                    |                                                                  | 2003 |
| Armenia                      | 2014                                      | Information and Analytic Center of the Ministry of Health                                                                                                                                                                                                                     |                                                                  | 2012 |
| Austria                      | 2014                                      | Austrian Medical Chamber                                                                                                                                                                                                                                                      |                                                                  | 2011 |
| Azerbaijan                   | 2012                                      | WHO European Regional Office (2014) European database on human and technical resources for health (HlthRes-DB) (Accessed on September 18 2014): <a href="http://data.euro.who.int/HlthResDB/">http://data.euro.who.int/HlthResDB/</a>                                         | Surgeons encompasses anaesthesiologists                          | 2012 |
| Belarus                      | 2013                                      | Public Health in the Republic of Belarus – National Statistical Committee of the Republic of Belarus                                                                                                                                                                          |                                                                  | 2011 |
| Belgium                      | 2012                                      | Institut National d'Assurance Maladie Invalidité                                                                                                                                                                                                                              |                                                                  | 2011 |
| Bosnia and Herzegovina       | 2013                                      | Health Statistics Annual of Federation of Bosnia and Herzegovina (issued by: Institute for Public Health of Federation, Year XI, Issue XI, issued in Sarajevo in 2013., <a href="http://www.zzzjz.fbh.ba">www.zzzjz.fbh.ba</a> )                                              | Excludes Republika Srpska                                        | 2010 |
| Bulgaria                     | 2011                                      | Eurostat. Physicians by medical speciality Eurostat 2014 [cited 2014 May 16]. Available from: <a href="http://appsso.eurostat.ec.europa.eu/nui/show.do?dataset=hlth_rs_spec&amp;lang=en">http://appsso.eurostat.ec.europa.eu/nui/show.do?dataset=hlth_rs_spec&amp;lang=en</a> |                                                                  | 2011 |
| Croatia                      | 2010                                      | Eurostat. Physicians by medical speciality Eurostat 2014 [cited 2014 May 16]. Available from: <a href="http://appsso.eurostat.ec.europa.eu/nui/show.do?dataset=hlth_rs_spec&amp;lang=en">http://appsso.eurostat.ec.europa.eu/nui/show.do?dataset=hlth_rs_spec&amp;lang=en</a> |                                                                  | 2011 |
| Cyprus                       | 2011                                      | Statistical Service of Cyprus, Health and Hospital Statistics                                                                                                                                                                                                                 |                                                                  | 2011 |
| Czech Republic               | 2012                                      | Institute of Health Information and Statistics of the Czech Republic                                                                                                                                                                                                          |                                                                  | 2011 |
| Denmark                      | 2009                                      | Danish Health and Medicines Authority                                                                                                                                                                                                                                         |                                                                  | 2009 |
| Estonia                      | 2014                                      | Estonia Health Board                                                                                                                                                                                                                                                          |                                                                  | 2011 |
| Finland                      | 2014                                      | Finnish Medical Association                                                                                                                                                                                                                                                   |                                                                  | 2009 |
| France                       | 2013                                      | Conseil National de l'Ordre des Médecins                                                                                                                                                                                                                                      |                                                                  | 2012 |
| Georgia                      | 2012                                      | WHO European Regional Office (2014) European database on human and technical resources for health (HlthRes-DB) (Accessed on September 18 2014): <a href="http://data.euro.who.int/HlthResDB/">http://data.euro.who.int/HlthResDB/</a>                                         | Surgeons encompasses anaesthesiologists                          | 2012 |

|                                           |      |                                                                                                                                                                                                                                                                                |                                         |      |
|-------------------------------------------|------|--------------------------------------------------------------------------------------------------------------------------------------------------------------------------------------------------------------------------------------------------------------------------------|-----------------------------------------|------|
| Germany                                   | 2012 | The Information System of the Federal Health Monitoring, Germany                                                                                                                                                                                                               |                                         | 2011 |
| Greece                                    | 2012 | National Statistical Data of Greece                                                                                                                                                                                                                                            |                                         | 2001 |
| Hungary                                   | 2011 | Eurostat. Physicians by medical speciality Eurostat 2014 [cited 2014 May 16]. Available from: <a href="http://appsso.eurostat.ec.europa.eu/nui/show.do?dataset=hlth_rs_spec&amp;lang=en">http://appsso.eurostat.ec.europa.eu/nui/show.do?dataset=hlth_rs_spec&amp;lang=en</a>  |                                         | 2011 |
| Iceland                                   | 2014 | Register of Physicians, Directorate of Health                                                                                                                                                                                                                                  |                                         | 2012 |
| Ireland                                   | 2014 | Medical Council of Ireland                                                                                                                                                                                                                                                     |                                         | 2012 |
| Israel                                    | 2013 | Israel Ministry of Health                                                                                                                                                                                                                                                      |                                         | 2011 |
| Italy                                     | 2011 | Eurostat. Physicians by medical speciality Eurostat 2014 [cited 2014 May 16]. Available from: <a href="http://appsso.eurostat.ec.europa.eu/nui/show.do?dataset=hlth_rs_spec&amp;lang=en">http://appsso.eurostat.ec.europa.eu/nui/show.do?dataset=hlth_rs_spec&amp;lang=en</a>  |                                         | 2011 |
| Kazakhstan                                | 2012 | WHO European Regional Office (2014) European database on human and technical resources for health (HlthRes-DB) (Accessed on September 18 2014): <a href="http://data.euro.who.int/HlthResDB/">http://data.euro.who.int/HlthResDB/</a>                                          | Surgeons encompasses anaesthesiologists | 2012 |
| Kyrgyzstan                                | 2013 | Kyrgyz Republic Ministry of Health                                                                                                                                                                                                                                             |                                         | 2012 |
| Latvia                                    | 2014 | Latvia Ministry of Health                                                                                                                                                                                                                                                      |                                         | 2011 |
| Lithuania                                 | 2011 | Eurostat. Physicians by medical speciality Eurostat 2014 [cited 2014 May 16]. Available from: <a href="http://appsso.eurostat.ec.europa.eu/nui/show.do?dataset=hlth_rs_spec&amp;lang=en">http://appsso.eurostat.ec.europa.eu/nui/show.do?dataset=hlth_rs_spec&amp;lang=en</a>  |                                         | 2012 |
| Luxembourg                                | 2012 | Eurostat. Physicians by medical speciality Eurostat 2014 [cited 2014 May 16]. Available from: <a href="http://appsso.eurostat.ec.europa.eu/nui/show.do?dataset=hlth_rs_spec&amp;lang=en">http://appsso.eurostat.ec.europa.eu/nui/show.do?dataset=hlth_rs_spec&amp;lang=en</a>  |                                         | 2012 |
| Malta                                     | 2013 | Malta Medical Council Registers: Specialists Register                                                                                                                                                                                                                          |                                         | 2012 |
| Monaco                                    | 2014 | Monaco Ministry of Health                                                                                                                                                                                                                                                      |                                         | 2012 |
| Montenegro                                | 2011 | WHO European Regional Office (2014) European database on human and technical resources for health (HlthRes-DB) (Accessed on September 18 2014): <a href="http://data.euro.who.int/HlthResDB/">http://data.euro.who.int/HlthResDB/</a>                                          | Surgeons encompasses anaesthesiologists | 2011 |
| Netherlands                               | 2010 | Eurostat. Physicians by medical speciality Eurostat 2014 [cited 2014 May 16]. Available from: <a href="http://appsso.eurostat.ec.europa.eu/nui/show.do?dataset=hlth_rs_spec&amp;lang=en">http://appsso.eurostat.ec.europa.eu/nui/show.do?dataset=hlth_rs_spec&amp;lang=en</a>  |                                         | 2003 |
| Norway                                    | 2012 | Statistics Norway                                                                                                                                                                                                                                                              |                                         | 2011 |
| Poland                                    | 2014 | Polish Department of Social Dialogue                                                                                                                                                                                                                                           |                                         | 2011 |
| Portugal                                  | 2009 | Statistics Portugal and Portugal Medical Association                                                                                                                                                                                                                           |                                         | 2003 |
| Republic of Moldova                       | 2013 | Republic of Moldova Ministry of Health                                                                                                                                                                                                                                         |                                         | 2012 |
| Romania                                   | 2011 | Eurostat. Physicians by medical speciality Eurostat 2014 [cited 2014 May 16]. Available from: <a href="http://appsso.eurostat.ec.europa.eu/nui/show.do?dataset=hlth_rs_spec&amp;lang=en">http://appsso.eurostat.ec.europa.eu/nui/show.do?dataset=hlth_rs_spec&amp;lang=en</a>  |                                         | 2011 |
| Russian Federation                        | 2014 | Russian Federation Ministry of Health                                                                                                                                                                                                                                          |                                         | 2006 |
| San Marino                                | 2014 | Istituto per la Sicurezza Sociale (Public Healthcare Provider); Ordine dei medici e degli Odontoiatri                                                                                                                                                                          |                                         | 2012 |
| Serbia                                    | 2012 | WHO European Regional Office (2014) European database on human and technical resources for health (HlthRes-DB) (Accessed on September 18 2014): <a href="http://data.euro.who.int/HlthResDB/">http://data.euro.who.int/HlthResDB/</a>                                          | Surgeons encompasses anaesthesiologists | 2009 |
| Slovakia                                  | 2014 | Slovak Medical Chamber, Register of Health Professionals                                                                                                                                                                                                                       |                                         | 2007 |
| Slovenia                                  | 2013 | Medical Chamber of Slovenia                                                                                                                                                                                                                                                    | Only members counted                    | 2011 |
| Spain                                     | 2014 | Ministry of Health Report 2014                                                                                                                                                                                                                                                 |                                         | 2012 |
| Sweden                                    | 2011 | The National Board of Health and Welfare                                                                                                                                                                                                                                       |                                         | 2007 |
| Switzerland                               | 2013 | Eurostat and The Federal Office of Public Health                                                                                                                                                                                                                               |                                         | 2011 |
| Tajikistan                                | 2014 | Statistics and Medical Information Centre, Tajikistan Ministry of Health and Social Protection of the Population                                                                                                                                                               |                                         | 2011 |
| The former Yugoslav Republic of Macedonia | 2011 | Eurostat. Physicians by medical speciality Eurostat 2014 [cited 2014 June 17]. Available from: <a href="http://appsso.eurostat.ec.europa.eu/nui/show.do?dataset=hlth_rs_spec&amp;lang=en">http://appsso.eurostat.ec.europa.eu/nui/show.do?dataset=hlth_rs_spec&amp;lang=en</a> |                                         | 2009 |
| Turkey                                    | 2011 | Eurostat. Physicians by medical speciality Eurostat 2014 [cited 2014 June 17]. Available from: <a href="http://appsso.eurostat.ec.europa.eu/nui/show.do?dataset=hlth_rs_spec&amp;lang=en">http://appsso.eurostat.ec.europa.eu/nui/show.do?dataset=hlth_rs_spec&amp;lang=en</a> |                                         | 2011 |
| Turkmenistan                              | 2014 | Turkmenistan Ministry of Health                                                                                                                                                                                                                                                |                                         | 2002 |
| Ukraine                                   | 2012 | WHO European Regional Office (2014) European database on human and technical resources for health (HlthRes-DB) (Accessed on September 18 2014): <a href="http://data.euro.who.int/HlthResDB/">http://data.euro.who.int/HlthResDB/</a>                                          | Surgeons encompasses anaesthesiologists | 2012 |
| United Kingdom                            | 2012 | UK General Medical Council                                                                                                                                                                                                                                                     |                                         | 2012 |
| Uzbekistan                                | 2012 | WHO European Regional Office (2014) European database on human and technical resources for health                                                                                                                                                                              | Surgeons encompasses                    | 2012 |



(HlthRes-DB) (Accessed on September 18 2014): <http://data.euro.who.int/HlthResDB/>

anaesthesiologists

**South East Asian Region**

|             |      |                                                                                                                                                                                                                                |                                              |      |
|-------------|------|--------------------------------------------------------------------------------------------------------------------------------------------------------------------------------------------------------------------------------|----------------------------------------------|------|
| Bangladesh  | 2012 | Lebrun DG, Dhar D, Sarkar MI, Imran TM, Kazi SN, McQueen KA. Measuring global surgical disparities: a survey of surgical and anesthesia infrastructure in Bangladesh. World journal of surgery 2013; 37(1): 24-31.             |                                              | 2011 |
| Bhutan      | 2014 | Medical Superintendent, Jigme Dorji Wanchuck National Referral Hospital, Thimpu, Bhutan                                                                                                                                        |                                              | 2012 |
| India       | 2009 | Association of Surgeons of India, Indian Orthopaedic Association, Federation of Obstetric and Gynaecological Societies of India, Indian Society of Anaesthesiologists; reflects only membership numbers of these organizations | Based on membership of specialist societies. | 2012 |
| Maldives    | 2014 | Maldives Medical Council                                                                                                                                                                                                       |                                              | 2010 |
| Myanmar     | 2013 | Myanmar Ministry of Health, Department of Medical Science                                                                                                                                                                      |                                              | 2012 |
| Nepal       | 2014 | Society of Surgeons of Nepal; Society of Anesthesiologists of Nepal; Nepal Society of Obstetricians and Gynaecologists                                                                                                         |                                              | 2004 |
| Sri Lanka   | 2013 | Sri Lanka Ministry of Health                                                                                                                                                                                                   |                                              | 2010 |
| Thailand    | 2014 | The Medical Council of Thailand                                                                                                                                                                                                |                                              | 2010 |
| Timor-Leste | 2014 | Timor-Leste Ministry of Health                                                                                                                                                                                                 |                                              | 2011 |

**Western Pacific Region**

|                                  |                                |                                                                                                                                                                                                                                                                                                                                                        |                                                                              |      |
|----------------------------------|--------------------------------|--------------------------------------------------------------------------------------------------------------------------------------------------------------------------------------------------------------------------------------------------------------------------------------------------------------------------------------------------------|------------------------------------------------------------------------------|------|
| Australia                        | 2012                           | Australian Institute of Health and Welfare                                                                                                                                                                                                                                                                                                             |                                                                              | 2011 |
| China                            | 2012                           | National Health and Family Planning Commission of People's Republic of China                                                                                                                                                                                                                                                                           | Calculated based on proportion of specialists to general physician workforce | 2010 |
| Cook Islands                     | 2014                           | Cook Islands Ministry of Health workforce plan 2014-2020                                                                                                                                                                                                                                                                                               |                                                                              | 2009 |
| Fiji                             | 2014                           | Fiji Medical Council                                                                                                                                                                                                                                                                                                                                   |                                                                              | 2009 |
| Japan                            | Surgeons: 2013<br>Others: 2012 | Surgeons: Japanese Board of Medical Specialities ( <a href="http://www.japan-senmon-i.jp/data/">http://www.japan-senmon-i.jp/data/</a> ); Obstetricians and Anesthesiologists: Japanese Ministry of Health ( <a href="http://www.mhlw.go.jp/toukei/saikin/hw/ishi/12/dl/gaikyo.pdf">http://www.mhlw.go.jp/toukei/saikin/hw/ishi/12/dl/gaikyo.pdf</a> ) |                                                                              | 2010 |
| Kiribati                         | 2014                           | Medical Council Register at the Kiribati Ministry of Health and Medical Services                                                                                                                                                                                                                                                                       |                                                                              | 2010 |
| Lao People's Democratic Republic | 2014                           | Surgeons: University of health Sciences of Lao PDR; Anaesthesiologists: Lao Society of Anesthesiologists; Obstetricians: Lao Association of Obstetric Gynecology                                                                                                                                                                                       |                                                                              | 2012 |
| Malaysia                         | 2011                           | Malaysia National Healthcare Establishment & Workforce Statistics 2011                                                                                                                                                                                                                                                                                 |                                                                              | 2010 |
| Marshall Islands                 | 2011                           | Ministry of Health Republic of the Marshall Islands Annual Report Fy 2011                                                                                                                                                                                                                                                                              |                                                                              | 2010 |
| Micronesia (Federated States of) | 2014                           | Micronesia Anesthesia Society Database                                                                                                                                                                                                                                                                                                                 |                                                                              | 2009 |
| Mongolia                         | 2013                           | National Center of Health Development, Mongolia Ministry of Health                                                                                                                                                                                                                                                                                     |                                                                              | 2008 |
| Nauru                            | 2014                           | Report of the Royal Australasian College of Surgeons                                                                                                                                                                                                                                                                                                   |                                                                              | 2010 |
| New Zealand                      | 2014                           | Medical Council of New Zealand                                                                                                                                                                                                                                                                                                                         |                                                                              | 2010 |
| Niue                             | 2014                           | Niue Health Department Data                                                                                                                                                                                                                                                                                                                            |                                                                              | 2008 |
| Papua New Guinea                 | 2014                           | Papua New Guinea Obstetrics and Gynaecology Society                                                                                                                                                                                                                                                                                                    |                                                                              | 2008 |
| Philippines                      | 2014                           | Philippine College of Surgeons; Philippine Obstetrics and Gynecologists Society; Philippine Society of Anesthesiologists                                                                                                                                                                                                                               |                                                                              | 2004 |
| Republic of Korea                | 2014                           | National Health Insurance Service (NHIS) and Health Insurance Review and Assessment Service (HIRA)                                                                                                                                                                                                                                                     |                                                                              | 2012 |
| Samoa                            | 2014                           | Samoa National Health Services                                                                                                                                                                                                                                                                                                                         |                                                                              | 2008 |
| Singapore                        | 2013                           | Singapore Medical Council                                                                                                                                                                                                                                                                                                                              |                                                                              | 2010 |
| Solomon Islands                  | 2011                           | Natuzzi ES, Kushner A, Jagilly R, et al. Surgical care in the Solomon Islands: a road map for universal surgical care delivery. World journal of surgery 2011; 35(6): 1183-93.                                                                                                                                                                         |                                                                              | 2009 |
| Tonga                            | 2014                           | Ministry of Health, Tonga                                                                                                                                                                                                                                                                                                                              |                                                                              | 2010 |
| Vanuatu                          | 2014                           | Vanuatu Ministry Of Health                                                                                                                                                                                                                                                                                                                             |                                                                              | 2008 |

**Table S2. Characteristics of the 167 countries with workforce data, by World Bank Income Category, WHO Region and Health Expenditure Quintiles**

|                                                 | Countries |      | Population <sup>1</sup> |      |
|-------------------------------------------------|-----------|------|-------------------------|------|
|                                                 | n         | %    | n                       | %    |
| <b>Total Sample</b>                             | 167       | 86%  | 6,512                   | 92%  |
| <b>World Bank Income Categories</b>             |           |      |                         |      |
| High                                            | 51        | 90%  | 1,224                   | 97%  |
| Upper middle                                    | 45        | 83%  | 2,388                   | 98%  |
| Lower middle                                    | 41        | 85%  | 2,122                   | 84%  |
| Low                                             | 30        | 86%  | 778                     | 94%  |
| <b>WHO Regions</b>                              |           |      |                         |      |
| African region                                  | 37        | 79%  | 827                     | 92%  |
| American region                                 | 31        | 89%  | 946                     | 99%  |
| Eastern Mediterranean region                    | 15        | 71%  | 526                     | 87%  |
| European region                                 | 53        | 100% | 904                     | 100% |
| Southeast Asian region                          | 9         | 82%  | 1,565                   | 85%  |
| Western Pacific region                          | 22        | 82%  | 1,744                   | 94%  |
| <b>Health Expenditure Quintiles<sup>2</sup></b> |           |      |                         |      |
| 5th                                             | 37        | 95%  | 1,015                   | 100% |
| 4th                                             | 33        | 87%  | 853                     | 95%  |
| 3rd                                             | 31        | 82%  | 1,796                   | 99%  |
| 2nd                                             | 32        | 84%  | 1,827                   | 82%  |
| 1st                                             | 33        | 85%  | 1,007                   | 95%  |

<sup>1</sup>Population in millions

<sup>2</sup>Zimbabwe and Democratic People's Republic of Korea were excluded due to lack of health expenditure data

**Table S3. National indicators<sup>1</sup> used as predictors for the imputation of density of surgeons, anaesthesiologists and obstetricians. 100 imputations and with restriction to absolute values.**

Births attended by skilled health staff (% of total)  
Corruption Perception Index  
Fertility rate, total (births per woman)  
GNI per capita, Atlas method (current US\$)  
Health expenditure per capita (current US\$)  
Immunization, measles (% of children ages 12-23 months)  
Improved water source (% of population with access)  
Labor force, female (% of total labor force)  
Maternal mortality ratio (modeled estimate, per 100,000 live births)  
Mortality rate, infant (per 1,000 live births)  
Mortality rate, under-5 (per 1,000 live births)  
Nurses and midwives (per 1,000 people)  
Out-of-pocket health expenditure (% of total expenditure on health)  
Physicians (per 1,000 people)  
Population growth (annual %)  
Urban population growth (annual %)

1. World Bank. World DataBank. 2014. <http://databank.worldbank.org/data/home.aspx>.

**Table S4. National number and density of surgeons, anaesthesiologists and obstetricians per 100,000 population, tabulated by WHO region.**

| WHO Name                         | Population <sup>1</sup> | Surgeons |         | Anaesthesiologists |         | Obstetricians |         | Total |         |
|----------------------------------|-------------------------|----------|---------|--------------------|---------|---------------|---------|-------|---------|
|                                  |                         | n        | density | n                  | density | n             | density | n     | density |
| <b>African Region</b>            |                         |          |         |                    |         |               |         |       |         |
| Algeria                          | 385                     | 3204     | 8.3     | 825                | 2.1     | 599           | 1.6     | 4628  | 12.0    |
| Angola                           | 208                     | –        | –       | –                  | –       | –             | –       | –     | –       |
| Benin                            | 101                     | 81       | 0.8     | 20                 | 0.2     | 90            | 0.9     | 191   | 1.9     |
| Botswana                         | 20                      | 40       | 2.0     | 18                 | 0.9     | 18            | 0.9     | 76    | 3.8     |
| Burkina Faso                     | 165                     | 36       | 0.2     | 58                 | 0.4     | 10            | 0.1     | 104   | 0.6     |
| Burundi                          | 99                      | –        | –       | –                  | –       | –             | –       | –     | –       |
| Cameroon                         | 217                     | 83       | 0.4     | 22                 | 0.1     | 151           | 0.7     | 256   | 1.2     |
| Cape Verde                       | 5                       | 57       | 11.5    | 11                 | 2.2     | 12            | 2.4     | 80    | 16.2    |
| Central African Republic         | 45                      | 9        | 0.2     | 0                  | 0.0     | 8             | 0.2     | 17    | 0.4     |
| Chad                             | 124                     | 18       | 0.1     | 2                  | 0.0     | 13            | 0.1     | 33    | 0.3     |
| Comoros                          | 7                       | –        | –       | –                  | –       | –             | –       | –     | –       |
| Congo                            | 43                      | 7        | 0.2     | 0                  | 0.0     | 3             | 0.1     | 10    | 0.2     |
| Côte d'Ivoire                    | 198                     | 318      | 1.6     | 80                 | 0.4     | 238           | 1.2     | 636   | 3.2     |
| Democratic Republic of the Congo | 657                     | 54       | 0.1     | 32                 | 0.0     | 39            | 0.1     | 125   | 0.2     |
| Equatorial Guinea                | 7                       | –        | –       | –                  | –       | –             | –       | –     | –       |
| Eritrea                          | 61                      | –        | –       | 1                  | 0.0     | 17            | 0.3     | –     | –       |
| Ethiopia                         | 917                     | 349      | 0.4     | 44                 | 0.0     | 147           | 0.2     | 540   | 0.6     |
| Gabon                            | 16                      | –        | –       | 15                 | 0.9     | –             | –       | –     | –       |
| Gambia                           | 18                      | 10       | 0.6     | 1                  | 0.1     | 8             | 0.4     | 19    | 1.1     |
| Ghana                            | 254                     | –        | –       | –                  | –       | –             | –       | –     | –       |
| Guinea                           | 115                     | –        | –       | 6                  | 0.1     | –             | –       | –     | –       |
| Guinea-Bissau                    | 17                      | –        | –       | –                  | –       | –             | –       | –     | –       |
| Kenya                            | 432                     | 316      | 0.7     | 129                | 0.3     | 357           | 0.8     | 802   | 1.9     |
| Lesotho                          | 21                      | 4        | 0.2     | 5                  | 0.2     | 3             | 0.1     | 12    | 0.6     |
| Liberia                          | 42                      | 23       | 0.5     | –                  | –       | –             | –       | –     | –       |
| Madagascar                       | 223                     | 90       | 0.4     | 28                 | 0.1     | 21            | 0.1     | 139   | 0.6     |
| Malawi                           | 159                     | 61       | 0.4     | 11                 | 0.1     | 7             | 0.0     | 79    | 0.5     |
| Mali                             | 149                     | 151      | 1.0     | 21                 | 0.1     | –             | –       | –     | –       |
| Mauritania                       | 38                      | –        | –       | –                  | –       | –             | –       | –     | –       |
| Mauritius                        | 12                      | 88       | 7.1     | 67                 | 5.4     | 79            | 6.4     | 234   | 18.9    |
| Mozambique                       | 252                     | 186      | 0.7     | 28                 | 0.1     | 63            | 0.2     | 277   | 1.1     |
| Namibia                          | 23                      | –        | –       | –                  | –       | –             | –       | –     | –       |
| Niger                            | 172                     | 31       | 0.2     | 6                  | 0.0     | 42            | 0.2     | 79    | 0.5     |
| Nigeria                          | 1690                    | 1827     | 1.1     | 144                | 0.1     | 454           | 0.3     | 2425  | 1.4     |
| Rwanda                           | 115                     | 42       | 0.4     | 15                 | 0.1     | 25            | 0.2     | 82    | 0.7     |
| Sao Tome and Principe            | 2                       | –        | –       | –                  | –       | –             | –       | –     | –       |
| Senegal                          | 137                     | 38       | 0.3     | 42                 | 0.3     | 57            | 0.4     | 137   | 1.0     |
| Seychelles                       | 1                       | 22       | 23.9    | 4                  | 4.3     | 6             | 6.5     | 32    | 34.8    |
| Sierra Leone                     | 60                      | 5        | 0.1     | 1                  | 0.0     | 3             | 0.1     | 9     | 0.2     |
| South Africa                     | 524                     | 3453     | 6.6     | 1143               | 2.2     | 1631          | 3.1     | 6227  | 11.9    |
| South Sudan                      | 108                     | –        | –       | –                  | –       | –             | –       | –     | –       |
| Swaziland                        | 12                      | –        | –       | 2                  | 0.2     | –             | –       | –     | –       |
| Togo                             | 66                      | 20       | 0.3     | 6                  | 0.1     | 10            | 0.2     | 36    | 0.5     |

|                                     |      |        |      |       |      |       |      |       |       |
|-------------------------------------|------|--------|------|-------|------|-------|------|-------|-------|
| Uganda                              | 363  | 204    | 0.6  | 17    | 0.05 | 124   | 0.3  | 345   | 0.9   |
| United Republic of Tanzania         | 478  | 100    | 0.2  | 6     | 0.0  | 50    | 0.1  | 156   | 0.3   |
| Zambia                              | 141  | 97     | 0.7  | 13    | 0.1  | 46    | 0.3  | 156   | 1.1   |
| Zimbabwe                            | 137  | 80     | 0.6  | 48    | 0.3  | 63    | 0.5  | 191   | 1.4   |
| <b>American Region</b>              |      |        |      |       |      |       |      |       |       |
| Antigua and Barbuda                 | 1    | 5      | 5.6  | 2     | 2.2  | 6     | 6.7  | 13    | 14.6  |
| Argentina                           | 411  | –      | –    | 4500  | 11.0 | –     | –    | –     | –     |
| Bahamas                             | 4    | –      | –    | –     | –    | –     | –    | –     | –     |
| Barbados                            | 3    | 18     | 6.4  | 19    | 6.7  | 12    | 4.2  | 49    | 17.3  |
| Belize                              | 3    | –      | –    | –     | –    | –     | –    | –     | –     |
| Bolivia (Plurinational State of)    | 105  | 1807   | 17.2 | 1270  | 12.1 | 500   | 4.8  | 3577  | 34.1  |
| Brazil                              | 1990 | 70298  | 35.3 | 25032 | 12.6 | 22511 | 11.3 | 11784 | 59.2  |
|                                     |      |        |      |       |      |       |      | 1     |       |
| Canada                              | 348  | 7352   | 21.1 | 1995  | 5.7  | 3070  | 8.8  | 12417 | 35.6  |
| Chile                               | 175  | 7137   | 40.9 | 2322  | 13.3 | 1931  | 11.1 | 11390 | 65.2  |
| Colombia                            | 477  | 2776   | 5.8  | 2634  | 5.5  | 2338  | 4.9  | 7748  | 16.2  |
| Costa Rica                          | 48   | 406    | 8.4  | 280   | 5.8  | 375   | 7.8  | 1061  | 22.1  |
| Cuba                                | 113  | 8026   | 71.2 | 1806  | 16.0 | 3001  | 26.6 | 12833 | 113.9 |
| Dominica                            | 1    | 2      | 2.8  | 2     | 2.8  | 4     | 5.6  | 8     | 11.1  |
| Dominican Republic                  | 103  | –      | –    | –     | –    | –     | –    | –     | –     |
| Ecuador                             | 155  | 5461   | 35.3 | 1996  | 12.9 | 2016  | 13.0 | 9473  | 61.1  |
| El Salvador                         | 63   | 1222   | 19.4 | 118   | 1.9  | –     | –    | –     | –     |
| Grenada                             | 1    | 3      | 2.9  | 2     | 1.9  | 7     | 6.7  | 12    | 11.4  |
| Guatemala                           | 151  | 201    | 1.3  | 155   | 1.0  | 188   | 1.2  | 544   | 3.6   |
| Guyana                              | 8    | 45     | 5.7  | 9     | 1.1  | 13    | 1.6  | 67    | 8.4   |
| Haiti                               | 102  | 115    | 1.1  | 60    | 0.6  | 300   | 2.9  | 475   | 4.7   |
| Honduras                            | 79   | 444    | 5.6  | 147   | 1.9  | 498   | 6.3  | 1089  | 13.7  |
| Jamaica                             | 28   | 183    | 6.6  | 40    | 1.4  | 99    | 3.6  | 322   | 11.6  |
| Mexico                              | 1210 | 25900  | 21.4 | 8750  | 7.2  | 14455 | 11.9 | 49105 | 40.6  |
| Nicaragua                           | 60   | 524    | 8.7  | 157   | 2.6  | 269   | 4.5  | 950   | 15.9  |
| Panama                              | 38   | 423    | 11.1 | 209   | 5.5  | 391   | 10.3 | 1023  | 26.9  |
| Paraguay                            | 67   | 356    | 5.3  | 157   | 2.3  | 429   | 6.4  | 942   | 14.1  |
| Peru                                | 300  | 8804   | 29.4 | 1382  | 4.6  | 2679  | 8.9  | 12865 | 42.9  |
| Saint Kitts and Nevis               | 1    | 6      | 11.1 | 3     | 5.6  | 8     | 14.8 | 17    | 31.5  |
| Saint Lucia                         | 2    | 20     | 11.0 | 7     | 3.9  | 15    | 8.3  | 42    | 23.2  |
| Saint Vincent and the Grenadines    | 1    | 4      | 3.7  | 2     | 1.8  | 8     | 7.3  | 14    | 12.8  |
| Suriname                            | 5    | –      | –    | –     | –    | –     | –    | –     | –     |
| Trinidad and Tobago                 | 13   | 247    | 18.5 | 75    | 5.6  | 99    | 7.4  | 421   | 31.5  |
| United States of America            | 3180 | 114679 | 36.1 | 46446 | 14.6 | 40123 | 12.6 | 20124 | 63.3  |
|                                     |      |        |      |       |      |       |      | 8     |       |
| Uruguay                             | 34   | 400    | 11.8 | 330   | 9.7  | 600   | 17.7 | 1330  | 39.2  |
| Venezuela (Bolivarian Republic of)  | 300  | 3411   | 11.4 | –     | –    | 2154  | 7.2  | –     | –     |
| <b>Eastern Mediterranean Region</b> |      |        |      |       |      |       |      |       |       |
| Afghanistan                         | 298  | –      | –    | 8     | 0.03 | –     | –    | –     | –     |
| Bahrain                             | 13   | 201    | 15.3 | 67    | 5.1  | 58    | 4.4  | 326   | 24.7  |
| Djibouti                            | 9    | 17     | 2.0  | 9     | 1.0  | 13    | 1.5  | 39    | 4.5   |
| Egypt                               | 807  | 23966  | 29.7 | 5533  | 6.9  | 15363 | 19.0 | 44862 | 55.6  |

|                            |      |       |      |       |       |       |      |       |       |
|----------------------------|------|-------|------|-------|-------|-------|------|-------|-------|
| Iran (Islamic Republic of) | 764  | 1272  | 1.7  | 1421  | 1.9   | 1197  | 1.6  | 3890  | 5.1   |
| Iraq                       | 328  | 1071  | 3.3  | 488   | 1.5   | 974   | 3.0  | 2533  | 7.7   |
| Jordan                     | 70   | –     | –    | –     | –     | –     | –    | –     | –     |
| Kuwait                     | 33   | –     | –    | –     | –     | –     | –    | –     | –     |
| Lebanon                    | 46   | 2547  | 54.8 | 486   | 10.5  | 941   | 20.2 | 3974  | 85.5  |
| Libya                      | 62   | –     | –    | –     | –     | –     | –    | –     | –     |
| Morocco                    | 325  | 2534  | 7.8  | 320   | 1.0   | 1064  | 3.3  | 3918  | 12.0  |
| Oman                       | 33   | 556   | 16.8 | 192   | 5.8   | 195   | 5.9  | 943   | 28.5  |
| Pakistan                   | 1790 | 2239  | 1.3  | 2722  | 1.5   | 4951  | 2.8  | 9912  | 5.5   |
| Qatar                      | 21   | 67    | 3.3  | 128   | 6.2   | 81    | 3.9  | 276   | 13.5  |
| Saudi Arabia               | 283  | –     | –    | –     | –     | –     | –    | –     | –     |
| Somalia                    | 102  | 15    | 0.1  | 1     | 0.001 | 5     | 0.05 | 21    | 0.2   |
| Sudan                      | 372  | 300   | 0.8  | 250   | 0.7   | 500   | 1.3  | 1050  | 2.8   |
| Syrian Arab Republic       | 219  | –     | –    | –     | –     | –     | –    | –     | –     |
| Tunisia                    | 109  | 327   | 3.0  | 255   | 2.3   | 695   | 6.4  | 1277  | 11.7  |
| United Arab Emirates       | 92   | –     | –    | –     | –     | –     | –    | –     | –     |
| Yemen                      | 239  | 104   | 0.4  | 15    | 0.1   | 93    | 0.4  | 212   | 0.9   |
| <b>European Region</b>     |      |       |      |       |       |       |      |       |       |
| Albania                    | 32   | –     | –    | –     | –     | 45    | 1.4  | 206   | 6.5   |
| Andorra                    | 1    | 20    | 25.6 | 10    | 12.8  | 14    | 17.9 | 44    | 56.4  |
| Armenia                    | 30   | 1011  | 34.1 | 419   | 14.1  | 784   | 26.4 | 2214  | 74.6  |
| Austria                    | 85   | 7767  | 91.8 | 1761  | 20.8  | 2518  | 29.7 | 12046 | 142.3 |
| Azerbaijan                 | 93   | –     | –    | –     | –     | 1982  | 21.3 | 5850  | 62.8  |
| Belarus                    | 94   | 6428  | 68.3 | 2466  | 26.2  | 2590  | 27.5 | 11484 | 122.1 |
| Belgium                    | 111  | 5571  | 50.4 | 2281  | 20.6  | 1541  | 13.9 | 9393  | 84.9  |
| Bosnia and Herzegovina     | 38   | 275   | 7.2  | 54    | 1.4   | 115   | 3.0  | 444   | 11.6  |
| Bulgaria                   | 73   | 4716  | 64.8 | 1386  | 19.0  | 1439  | 19.8 | 7541  | 103.6 |
| Croatia                    | 43   | 1822  | 42.3 | 730   | 16.9  | 777   | 18.0 | 3329  | 77.3  |
| Cyprus                     | 11   | 143   | 12.7 | 32    | 2.8   | 57    | 5.0  | 232   | 20.5  |
| Czech Republic             | 107  | 7762  | 72.8 | 2581  | 24.2  | 2876  | 27.0 | 13219 | 124.0 |
| Denmark                    | 56   | 1641  | 29.3 | 278   | 5.0   | 264   | 4.7  | 2183  | 39.0  |
| Estonia                    | 13   | 189   | 14.6 | 536   | 41.5  | 938   | 72.7 | 1663  | 128.8 |
| Finland                    | 54   | 4081  | 75.5 | 933   | 17.3  | 1000  | 18.5 | 6014  | 111.2 |
| France                     | 639  | 18793 | 29.4 | 7076  | 11.1  | 10247 | 16.0 | 36116 | 56.5  |
| Georgia                    | 44   | –     | –    | –     | –     | 1453  | 33.3 | 3212  | 73.7  |
| Germany                    | 828  | 44449 | 53.7 | 23468 | 28.3  | 25752 | 31.1 | 93669 | 113.1 |
| Greece                     | 111  | 10011 | 90.0 | 2843  | 25.6  | 1867  | 16.8 | 14721 | 132.3 |
| Hungary                    | 100  | 3189  | 32.0 | 1220  | 12.2  | 1245  | 12.5 | 5654  | 56.7  |
| Iceland                    | 3    | 167   | 51.2 | 45    | 13.8  | 55    | 16.9 | 267   | 81.9  |
| Ireland                    | 46   | 680   | 14.9 | 197   | 4.3   | 454   | 9.9  | 1331  | 29.1  |
| Israel                     | 76   | 3161  | 41.4 | 1049  | 13.7  | 636   | 8.3  | 4846  | 63.4  |
| Italy                      | 609  | 12146 | 19.9 | 13977 | 23.0  | 13090 | 21.5 | 39213 | 64.4  |
| Kazakhstan                 | 163  | –     | –    | –     | –     | 4816  | 29.6 | 12237 | 75.2  |
| Kyrgyzstan                 | 55   | 1868  | 34.1 | 592   | 10.8  | 994   | 18.2 | 3454  | 63.1  |
| Latvia                     | 21   | 1055  | 51.2 | 453   | 22.0  | 405   | 19.7 | 1913  | 92.9  |
| Lithuania                  | 30   | 1879  | 62.1 | 696   | 23.0  | 1316  | 43.5 | 3891  | 128.5 |
| Luxembourg                 | 5    | 275   | 52.5 | 80    | 15.3  | 92    | 17.6 | 447   | 85.3  |
| Malta                      | 4    | 182   | 42.5 | 51    | 11.9  | 82    | 19.2 | 315   | 73.6  |

|                                           |       |        |       |        |      |       |      |       |       |
|-------------------------------------------|-------|--------|-------|--------|------|-------|------|-------|-------|
| Monaco                                    | 0     | 42     | 110.5 | 23     | 60.5 | 8     | 21.1 | 73    | 192.1 |
| Montenegro                                | 6     | –      | –     | –      | –    | 101   | 16.3 | 335   | 53.9  |
| Netherlands                               | 167   | 4946   | 29.6  | 1252   | 7.5  | 1672  | 10.0 | 7870  | 47.1  |
| Norway                                    | 50    | 3751   | 75.1  | 783    | 15.7 | 1040  | 20.8 | 5574  | 111.6 |
| Poland                                    | 382   | 5954   | 15.6  | 6051   | 15.8 | 4812  | 12.6 | 16817 | 44.0  |
| Portugal                                  | 106   | 5060   | 47.7  | 1533   | 14.5 | 1520  | 14.3 | 8113  | 76.5  |
| Republic of Moldova                       | 35    | 563    | 16.0  | 553    | 15.7 | 641   | 18.2 | 1757  | 50.0  |
| Romania                                   | 218   | 8204   | 37.7  | 2279   | 10.5 | 1666  | 7.7  | 12149 | 55.8  |
| Russian Federation                        | 1430  | 23842  | 16.7  | 38050  | 26.6 | 28894 | 20.2 | 90786 | 63.5  |
| San Marino                                | 0     | 17     | 54.8  | 12     | 38.7 | 7     | 22.6 | 36    | 116.1 |
| Serbia                                    | 96    | –      | –     | –      | –    | 1317  | 13.8 | 5185  | 54.3  |
| Slovakia                                  | 54    | 1001   | 18.4  | 1136   | 20.9 | 961   | 17.6 | 3098  | 56.9  |
| Slovenia                                  | 21    | 749    | 36.2  | 431    | 20.8 | 415   | 20.1 | 1595  | 77.1  |
| Spain                                     | 468   | 10673  | 22.8  | 4869   | 10.4 | 4018  | 8.6  | 19560 | 41.8  |
| Sweden                                    | 95    | 2472   | 26.0  | 1319   | 13.9 | 1549  | 16.3 | 5340  | 56.1  |
| Switzerland                               | 80    | 4091   | 51.2  | 1431   | 17.9 | 1699  | 21.2 | 7221  | 90.3  |
| Tajikistan                                | 80    | 1309   | 16.3  | 645    | 8.1  | 1486  | 18.6 | 3440  | 43.0  |
| The former Yugoslav Republic of Macedonia | 21    | 763    | 36.2  | 359    | 17.0 | 213   | 10.1 | 1335  | 63.4  |
| Turkey                                    | 740   | 6104   | 8.2   | 5431   | 7.3  | 6324  | 8.5  | 17859 | 24.1  |
| Turkmenistan                              | 52    | 1572   | 30.4  | 694    | 13.4 | 756   | 14.6 | 3022  | 58.4  |
| Ukraine                                   | 455   | –      | –     | –      | –    | 12745 | 28.0 | 45608 | 100.2 |
| United Kingdom                            | 628   | 21684  | 34.5  | 6080   | 9.7  | 12431 | 19.8 | 40195 | 64.0  |
| Uzbekistan                                | 285   | –      | –     | –      | –    | 5549  | 19.4 | 12975 | 45.5  |
| <b>South East Asia Region</b>             |       |        |       |        |      |       |      |       |       |
| Bangladesh                                | 1550  | 2615   | 1.7   | 1200   | 0.8  | 850   | 0.5  | 4665  | 3.0   |
| Bhutan                                    | 7     | 6      | 0.8   | 3      | 0.4  | 13    | 1.8  | 22    | 3.0   |
| Democratic People's Republic of Korea     | 248   | –      | –     | –      | –    | –     | –    | –     | –     |
| India                                     | 12400 | 31560  | 2.5   | 20280  | 1.6  | 29310 | 2.4  | 81150 | 6.5   |
| Indonesia                                 | 2470  | –      | –     | –      | –    | –     | –    | –     | –     |
| Maldives                                  | 3     | 6      | 1.8   | 2      | 0.6  | 13    | 3.8  | 21    | 6.2   |
| Myanmar                                   | 528   | 478    | 0.9   | 310    | 0.6  | 466   | 0.9  | 1254  | 2.4   |
| Nepal                                     | 275   | 254    | 0.9   | 193    | 0.7  | 336   | 1.2  | 783   | 2.8   |
| Sri Lanka                                 | 211   | 118    | 0.6   | 128    | 0.6  | 129   | 0.6  | 375   | 1.8   |
| Thailand                                  | 668   | 4284   | 6.4   | 1523   | 2.3  | 3154  | 4.7  | 8961  | 13.4  |
| Timor-Leste                               | 11    | 5      | 0.4   | 1      | 0.1  | 1     | 0.1  | 7     | 0.6   |
| <b>Western Pacific Region</b>             |       |        |       |        |      |       |      |       |       |
| Australia                                 | 231   | 5642   | 24.5  | 1669   | 7.2  | 4704  | 20.4 | 12015 | 52.1  |
| Brunei Darussalam                         | 4     | –      | –     | –      | –    | –     | –    | –     | –     |
| Cambodia                                  | 149   | –      | –     | –      | –    | –     | –    | –     | –     |
| China                                     | 13900 | 293021 | 21.1  | 194634 | 14.0 | 53471 | 3.8  | 54112 | 38.9  |
| Cook Islands                              | 0     | 1      | 4.8   | 1      | 4.8  | 1     | 4.8  | 3     | 14.3  |
| Fiji                                      | 9     | 16     | 1.8   | 9      | 1.0  | 12    | 1.4  | 37    | 4.2   |
| Japan                                     | 1270  | 21275  | 16.8  | 8140   | 6.4  | 10412 | 8.2  | 39827 | 31.4  |
| Kiribati                                  | 1     | 1      | 1.0   | 2      | 2.0  | 2     | 2.0  | 5     | 5.0   |
| Lao People's Democratic Republic          | 66    | 65     | 1.0   | 60     | 0.9  | 66    | 1.0  | 191   | 2.9   |
| Malaysia                                  | 292   | 1967   | 6.7   | 684    | 2.3  | 836   | 2.9  | 3487  | 11.9  |

|                                  |     |       |       |      |      |      |       |       |       |
|----------------------------------|-----|-------|-------|------|------|------|-------|-------|-------|
| Marshall Islands                 | 1   | 6     | 11.3  | 1    | 1.9  | 2    | 3.8   | 9     | 17.0  |
| Micronesia (Federated States of) | 1   | 11    | 10.7  | 7    | 6.8  | 11   | 10.7  | 29    | 28.2  |
| Mongolia                         | 28  | 403   | 14.4  | 296  | 10.6 | 682  | 24.4  | 1381  | 49.4  |
| Nauru                            | 0   | 1     | 10.0  | 1    | 10.0 | 1    | 10.0  | 3     | 30.0  |
| New Zealand                      | 45  | 821   | 18.4  | 264  | 5.9  | 689  | 15.4  | 1774  | 39.8  |
| Niue                             | 0   | 1     | 100.0 | 0    | 0.0  | 1    | 100.0 | 2     | 200.0 |
| Palau                            | 0   | –     | –     | –    | –    | –    | –     | –     | –     |
| Papua New Guinea                 | 72  | 36    | 0.5   | 24   | 0.3  | 18   | 0.3   | 78    | 1.1   |
| Philippines                      | 967 | 2500  | 2.6   | 3611 | 3.7  | 3362 | 3.5   | 9473  | 9.8   |
| Republic of Korea                | 490 | 15792 | 32.2  | 3771 | 7.7  | 5463 | 11.1  | 25026 | 51.1  |
| Samoa                            | 2   | 5     | 2.6   | 4    | 2.1  | 5    | 2.6   | 14    | 7.4   |
| Singapore                        | 53  | 1019  | 19.2  | 375  | 7.1  | 304  | 5.7   | 1698  | 32.0  |
| Solomon Islands                  | 6   | 5     | 0.9   | 3    | 0.5  | 4    | 0.7   | 12    | 2.2   |
| Tonga                            | 1   | 3     | 2.9   | 1    | 1.0  | 1    | 1.0   | 5     | 4.8   |
| Tuvalu                           | 0   | –     | –     | –    | –    | –    | –     | –     | –     |
| Vanuatu                          | 2   | 5     | 2.0   | 2    | 0.8  | 2    | 0.8   | 9     | 3.6   |
| Viet Nam                         | 908 | –     | –     | –    | –    | –    | –     | –     | –     |

<sup>1</sup> Population in 100,000s

Albania, Azerbaijan, Belarus, Georgia, Kazakhstan, Montenegro, Serbia, Turkmenistan, Ukraine and Uzbekistan provided aggregated data on the number of surgeons and anaesthesiologists (“surgical group of specialists”)

For inquiries about the dataset and to contribute by validating or updating individual data points, please refer to [www http://www.who.int/surgery/eesc\\_database/en/](http://www.who.int/surgery/eesc_database/en/).



**Table S5. The global distribution of surgeons, anaesthesiologists and obstetricians, by World Bank Income Category, WHO Region and Health Expenditure Quintiles. Median with [interquartile range]. Based on collected and imputed values.**

|                                        | Population* |     | Surgeons** |             |     | Anesthesiologists** |           |     | Obstetricians** |           |     | Total** |             |     |
|----------------------------------------|-------------|-----|------------|-------------|-----|---------------------|-----------|-----|-----------------|-----------|-----|---------|-------------|-----|
|                                        | n           | %   | n          | IQR         | %   | n                   | IQR       | %   | n               | IQR       | %   | n       | IQR         | %   |
| <b>Global</b>                          | 7054        | 100 | 1113       | [1059–1178] | 100 | 550                 | [529–573] | 100 | 483             | [456–518] | 100 | 2146    | [2052–2259] | 100 |
| <b>World Bank Income Categories</b>    |             |     |            |             |     |                     |           |     |                 |           |     |         |             |     |
| High                                   | 1267        | 18  | 393        | [389–397]   | 35  | 193                 | [191–194] | 35  | 194             | [192–196] | 40  | 780     | [773–788]   | 36  |
| Upper middle                           | 2435        | 35  | 504        | [494–515]   | 45  | 274                 | [270–277] | 50  | 148             | [144–154] | 31  | 925     | [910–943]   | 43  |
| Lower middle                           | 2522        | 36  | 191        | [158–232]   | 17  | 76                  | [62–92]   | 14  | 125             | [108–146] | 26  | 392     | [334–464]   | 18  |
| Low                                    | 830         | 12  | 25         | [18–33]     | 2   | 7                   | [6–9]     | 1   | 17              | [11–22]   | 3   | 49      | [35–65]     | 2   |
| <b>WHO Regions</b>                     |             |     |            |             |     |                     |           |     |                 |           |     |         |             |     |
| African region                         | 904         | 13  | 30         | [23–40]     | 3   | 9                   | [7–12]    | 2   | 15              | [10–21]   | 3   | 54      | [40–73]     | 3   |
| American region                        | 958         | 14  | 274        | [270–280]   | 25  | 103                 | [102–104] | 19  | 106             | [104–109] | 22  | 483     | [476–493]   | 23  |
| Eastern Mediterranean region           | 601         | 9   | 62         | [52–71]     | 6   | 19                  | [17–22]   | 4   | 36              | [31–41]   | 7   | 117     | [101–134]   | 5   |
| European region                        | 904         | 13  | 284        | [280–290]   | 26  | 154                 | [151–157] | 28  | 169             | [169–169] | 35  | 607     | [607–607]   | 28  |
| Southeast Asian region                 | 1837        | 26  | 97         | [78–121]    | 9   | 41                  | [33–51]   | 8   | 64              | [53–78]   | 13  | 202     | [164–250]   | 9   |
| Western Pacific region                 | 1850        | 26  | 366        | [356–377]   | 33  | 223                 | [220–227] | 41  | 94              | [89–99]   | 19  | 683     | [665–702]   | 32  |
| <b>Health Expenditure Quintiles***</b> |             |     |            |             |     |                     |           |     |                 |           |     |         |             |     |
| 5th                                    | 1016        | 14  | 341        | [341–341]   | 31  | 140                 | [140–140] | 25  | 152             | [152–152] | 32  | 633     | [633–633]   | 30  |
| 4th                                    | 895         | 13  | 200        | [192–209]   | 18  | 109                 | [108–111] | 20  | 104             | [101–109] | 22  | 414     | [402–429]   | 19  |
| 3rd                                    | 1822        | 26  | 375        | [369–381]   | 34  | 224                 | [220–228] | 41  | 98              | [96–100]  | 20  | 696     | [691–702]   | 32  |
| 2nd                                    | 2223        | 32  | 163        | [133–202]   | 15  | 65                  | [52–80]   | 12  | 105             | [88–125]  | 22  | 333     | [274–405]   | 16  |
| 1st                                    | 1060        | 15  | 27         | [20–35]     | 2   | 9                   | [8–11]    | 2   | 19              | [15–25]   | 4   | 56      | [43–71]     | 3   |

\* Population in millions

\*\* Providers in 1000s

\*\*\* Zimbabwe and Democratic People's Republic of Korea were excluded due to lack of health expenditure data

**Table S6. The density of surgeons, anaesthesiologists and obstetricians per 100,000 population, by World Bank Income Category, WHO Region and Health Expenditure Quintiles. Median with [interquartile range].**

|                                                 | <b>Surgeons</b> |             | <b>Anesthesiologists</b> |             | <b>Obstetricians</b> |             | <b>Total</b> |             |
|-------------------------------------------------|-----------------|-------------|--------------------------|-------------|----------------------|-------------|--------------|-------------|
|                                                 | /100,000        |             | /100,000                 |             | /100,000             |             | /100,000     |             |
| <b>Global</b>                                   | 8.7             | [1.1–29.4]  | 3.7                      | [0.6–11.9]  | 6.4                  | [1.2–16.8]  | 23.2         | [3.8–58.4]  |
| <b>World Bank Income Categories</b>             |                 |             |                          |             |                      |             |              |             |
| High                                            | 29.3            | [16.7–51.2] | 13.3                     | [6.4–20.8]  | 16.0                 | [8.6–20.1]  | 56.9         | [32.0–85.3] |
| Upper middle                                    | 8.4             | [3.7–30.4]  | 4.3                      | [1.9–11.0]  | 7.2                  | [3.6–12.5]  | 22.6         | [11.6–56.7] |
| Lower middle                                    | 2.0             | [0.8–8.7]   | 1.0                      | [0.3–2.3]   | 2.0                  | [0.7–6.4]   | 5.5          | [1.8–28.2]  |
| Low                                             | 0.5             | [0.2–0.9]   | 0.1                      | [0.03–0.3]  | 0.2                  | [0.1–0.8]   | 0.7          | [0.5–1.9]   |
| <b>WHO Regions</b>                              |                 |             |                          |             |                      |             |              |             |
| African region                                  | 0.5             | [0.2–1.0]   | 0.1                      | [0.05–0.4]  | 0.3                  | [0.1–0.9]   | 1.0          | [0.5–1.9]   |
| American region                                 | 11.1            | [5.6–21.1]  | 5.5                      | [1.9–9.7]   | 7.3                  | [4.9–11.1]  | 22.6         | [13.3–39.9] |
| Eastern Mediterranean region                    | 3.1             | [1.3–15.3]  | 1.5                      | [0.7–5.8]   | 3.1                  | [1.5–5.9]   | 9.7          | [4.5–24.7]  |
| European region                                 | 36.2            | [22.8–52.5] | 15.7                     | [11.1–20.9] | 18.2                 | [13.8–21.2] | 64.0         | [54.3–92.9] |
| Southeast Asian region                          | 0.9             | [0.8–1.8]   | 0.6                      | [0.6–0.8]   | 1.2                  | [0.6–2.4]   | 3.0          | [2.4–6.2]   |
| Western Pacific region                          | 8.4             | [2–18.4]    | 3.0                      | [1–7.1]     | 3.8                  | [1.4–10.7]  | 15.6         | [4.8–38.9]  |
| <b>Health Expenditure Quintiles<sup>1</sup></b> |                 |             |                          |             |                      |             |              |             |
| 5th                                             | 34.5            | [22.8–52.5] | 13.7                     | [7.2–20.6]  | 16.8                 | [10.0–20.4] | 63.4         | [47.1–90.3] |
| 4th                                             | 16.1            | [8.4–37.7]  | 7.3                      | [5.1–16.9]  | 10.7                 | [6.6–17.9]  | 39.9         | [23.7–64.4] |
| 3rd                                             | 6.7             | [4.2–13.7]  | 2.3                      | [1.9–5.4]   | 6.4                  | [3.8–11.8]  | 14.3         | [11.7–50.0] |
| 2nd                                             | 2.5             | [0.8–10.0]  | 1.0                      | [0.4–3.7]   | 1.9                  | [0.8–4.6]   | 5.7          | [2.5–23.1]  |
| 1st                                             | 0.5             | [0.3–0.9]   | 0.1                      | [0.04–0.3]  | 0.3                  | [0.1–0.8]   | 1.0          | [0.5–2.1]   |

<sup>1</sup>Zimbabwe and Democratic People's Republic of Korea were excluded due to lack of health expenditure data
